# Supplementary material for: LED and HPS Supplementary Light Differentially Affect Gas Exchange in Tomato Leaves
Source: MDPI journal article supplement (doi:10.3390/plants10040810), 2021-04-20
Supplement: s1 [file s1]

## Supplementary Material

### Supplementary Tables

**Table 1.** Stomatal conductance ( $g_s$ ) measured with the porometer per genotype and experiment. The average  $g_s$  ( $n = 9$ ) as well as the ratio of  $g_s$  in LED to HPS light is displayed. A significance of the difference between the light treatment groups HPS and LED is shown according to the  $p$ -value of a t-test: \*  $p$ -value  $< 0.05$ , \*\*  $p$ -value  $< 0.01$ , \*\*\*  $p$ -value  $< 0.001$ .

| Genotype            | Exp.       | Stomatal conductance (gs)<br>in HPS                     | Stomatal conductance (gs)<br>in LED | ratio<br>LED/HPS | Significance |
|---------------------|------------|---------------------------------------------------------|-------------------------------------|------------------|--------------|
|                     | (I-<br>IV) | (mol H <sub>2</sub> O m <sup>-2</sup> s <sup>-1</sup> ) |                                     |                  |              |
| Ailsa Craig         | I          | 271.1                                                   | 360.9                               | 1.33             | ***          |
| Ailsa Craig         | II         | 352.2                                                   | 446                                 | 1.27             | **           |
| Ailsa Craig         | III        | 571.4                                                   | 658.5                               | 1.15             | ***          |
| Ailsa Craig         | IV         | 560                                                     | 595.6                               | 1.06             | .            |
| Kentucky Beefsteack | I          | 280.6                                                   | 298.6                               | 1.06             | .            |
| Kentucky Beefsteack | II         | 353.9                                                   | 411.9                               | 1.16             | .            |
| Kentucky Beefsteack | III        | 587.6                                                   | 669.6                               | 1.14             | **           |
| Kentucky Beefsteack | IV         | 592                                                     | 640.5                               | 1.08             | .            |
| LA1578              | II         | 395.6                                                   | 326.1                               | 0.82             | .            |
| LA1579              | III        | 709.3                                                   | 758.5                               | 1.07             | .            |
| LA1580              | IV         | 675.5                                                   | 637.7                               | 0.94             | .            |
| Momotaro            | I          | 356.7                                                   | 354.6                               | 0.99             | .            |
| Momotaro            | II         | 422.3                                                   | 360.3                               | 0.85             | **           |
| Momotaro            | III        | 549.6                                                   | 694.2                               | 1.26             | ***          |
| Momotaro            | IV         | 506.2                                                   | 605                                 | 1.2              | *            |
| Moneymaker          | I          | 369                                                     | 349.7                               | 0.95             | .            |
| Moneymaker          | II         | 372.9                                                   | 449.2                               | 1.2              | *            |
| Moneymaker          | III        | 572.8                                                   | 645.6                               | 1.13             | **           |
| Moneymaker          | IV         | 490.7                                                   | 581.2                               | 1.18             | .            |
| Nunhems-FM001       | I          | 393                                                     | 375.3                               | 0.95             | .            |
| Nunhems-FM002       | II         | 388.8                                                   | 425.9                               | 1.1              | .            |
| Nunhems-FM003       | III        | 575.7                                                   | 616.1                               | 1.07             | .            |
| Nunhems-FM004       | IV         | 606.7                                                   | 631.2                               | 1.04             | .            |
| Rutgers             | I          | 277.5                                                   | 354.9                               | 1.28             | **           |
| Rutgers             | II         | 339.2                                                   | 375.3                               | 1.11             | .            |
| Rutgers             | III        | 546.8                                                   | 574.6                               | 1.05             | .            |
| Rutgers             | IV         | 463.5                                                   | 531.8                               | 1.15             | .            |

**Table 2.** Average stomatal conductance and transpiration rate (measured with LI-6400 XT) in seven tomato genotypes grown under HPS and LED supplemental light, during the third and fourth Expt. ( $n = 21$ ) and different genotypes ( $n = 3$ ). An ANOVA was done to determine the overall effect of the treatment or genotypes on the stomatal density. Significance: \*\*\*, \*\*, and \* for  $p \leq 0.001$ ,  $p \leq 0.01$ , and  $p \leq 0.05$ , respectively; NS—not significant. Per genotype and between the treatments, a post hoc test was performed and the significant different groups are indicated by letter. Identical letters in the same column indicate that means are not significantly different ( $p > 0.05$ ).

|                        | Stomatal conductance (molH <sub>2</sub> O m <sup>-2</sup> s <sup>-1</sup> ) |         | Transpiration rate (mmolH <sub>2</sub> O m <sup>-2</sup> s <sup>-1</sup> ) |         |
|------------------------|-----------------------------------------------------------------------------|---------|----------------------------------------------------------------------------|---------|
|                        | Expt. 3                                                                     | Expt. 4 | Expt. 3                                                                    | Expt. 4 |
| <b>Treatments (SL)</b> |                                                                             |         |                                                                            |         |
| HPS                    | 0.61 b                                                                      | 0.77 b  | 3.12 b                                                                     | 5.46 b  |
| LED                    | 0.74 a                                                                      | 0.87 a  | 4.13 a                                                                     | 5.57 a  |
| <b>Genotypes (G)</b>   |                                                                             |         |                                                                            |         |
| Moneymaker             | 0.70 b                                                                      | 0.82 d  | 3.81 b                                                                     | 5.52 d  |

|                     |        |        |        |        |
|---------------------|--------|--------|--------|--------|
| Momotaro            | 0.74 a | 0.76 f | 3.90 a | 5.36 f |
| LA1578              | 0.67 c | 0.95 a | 3.62 d | 5.91 a |
| Rutgers             | 0.52 d | 0.72 g | 3.27 g | 5.20 g |
| Kentucky Beefsteack | 0.67 c | 0.79 e | 3.49 f | 5.45 e |
| Nunhems-FM001       | 0.69 b | 0.83 c | 3.51 e | 5.53 c |
| Ailsa Craig         | 0.75 a | 0.85 b | 3.78 c | 5.63 b |
| <i>Significance</i> |        |        |        |        |
| SL                  | ***    | ***    | ***    | ***    |
| G                   | ***    | ***    | ***    | ***    |
| SL*G                | ***    | **     | ***    | **     |

**Table 3.** Thermal Index (Ig) per treatment ( $n = 21$ ) and genotype ( $n = 3$ ). Within the same main effect and for each parameter, the same lowercase letters in the same column indicate that the mean values are not significantly different ( $p = 0.05$ ). An ANOVA was done to determine the overall effect of the treatment or genotypes on the stomatal density. Significance: \*\*\*, \*\*, and \* for  $p \leq 0.001$ ,  $p \leq 0.01$ , and  $p \leq 0.05$ , respectively; NS—not significant. Per genotype and treatment, a post hoc test was performed and the significant different groups are indicated by letter. Identical letters in the same column indicate that means are not significantly different ( $p > 0.05$ ).

|                        | Thermal Index (Ig) |         |         |         |
|------------------------|--------------------|---------|---------|---------|
|                        | Expt. 1            | Expt. 2 | Expt. 3 | Expt. 4 |
| <b>Treatments (SL)</b> |                    |         |         |         |
| HPS                    | 1.2 b              | 1.4 b   | 2.1 b   | 2.3 a   |
| LED                    | 1.5 a              | 2.1 a   | 2.5 a   | 2.4 a   |
| <b>Genotypes (G)</b>   |                    |         |         |         |
| Money maker            | 1.8 a              | 2.5 a   | 1.9 cd  | 2.4 b   |
| Momotaro               | 1.3 bc             | 1.8 b   | 2.5 b   | 1.8 cd  |
| LA1578                 | -                  | 1.8 bc  | 2.4 b   | 3.3 a   |
| Rutgers                | 1.5 ab             | 1.7 bc  | 1.6 d   | 1.7 d   |
| Kentucky Beefsteack    | 0.9 d              | 1.5 cd  | 2.4 b   | 2.1 bc  |
| Nunhems-FM001          | 1.0 cd             | 1.5 bcd | 2.2 bc  | 1.9 cd  |
| Ailsa Craig            | 1.7 a              | 1.3 d   | 3.1 a   | 3.1 a   |
| <i>Significance</i>    |                    |         |         |         |
| SL                     | **                 | ***     | **      | NS      |
| G                      | ***                | ***     | ***     | ***     |
| SL*G                   | NS                 | ***     | ***     | NS      |

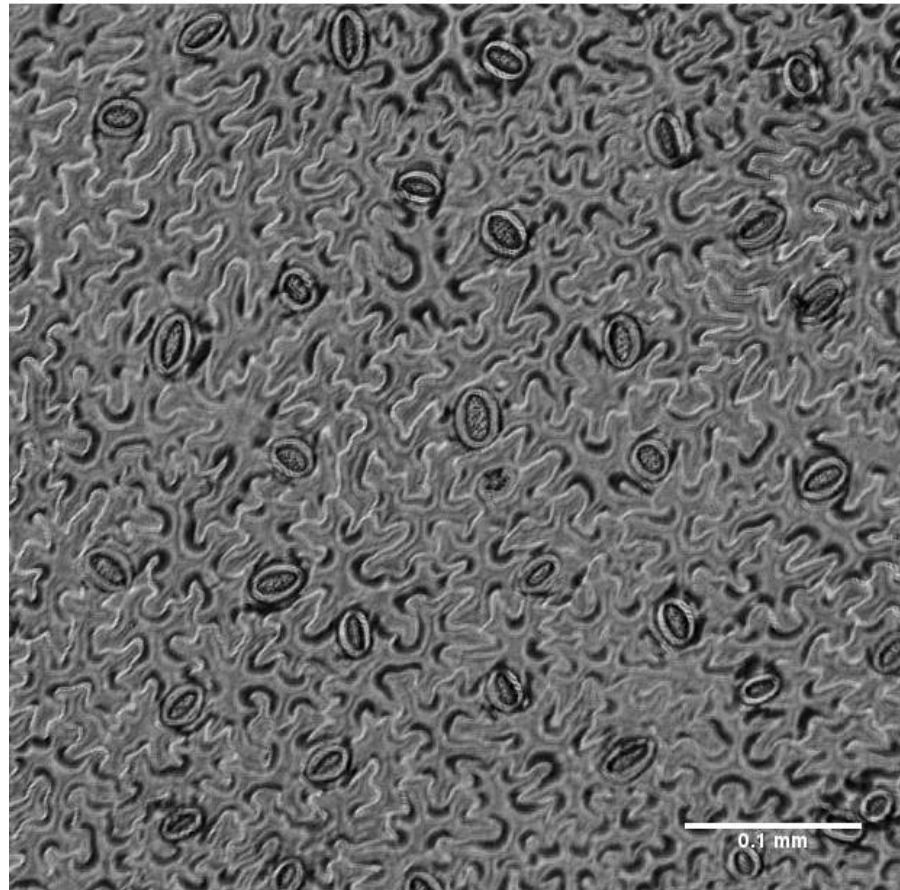

**Figure 1.** Stomatal imprint of cv. 'Rutgers' grown under LEDs supplemental light during the fourth trial.

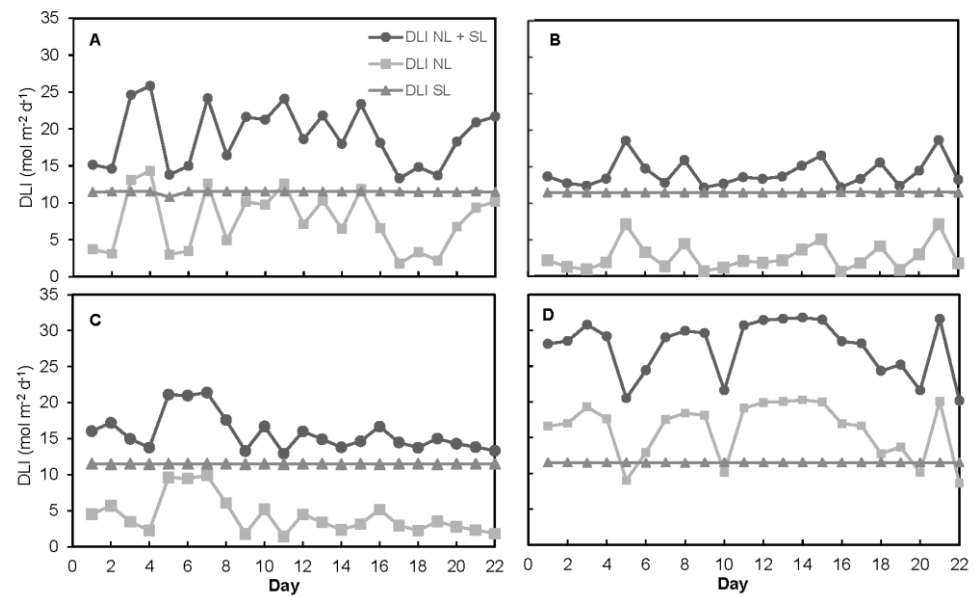

**Figure 2.** Daily light integral from natural light (DLI NL), from supplemental light (DLI SL) and the sum of DLI from supplemental light plus natural light (DLI NL + SL), in both treatment conditions, during experiments 1–4 (A–D).

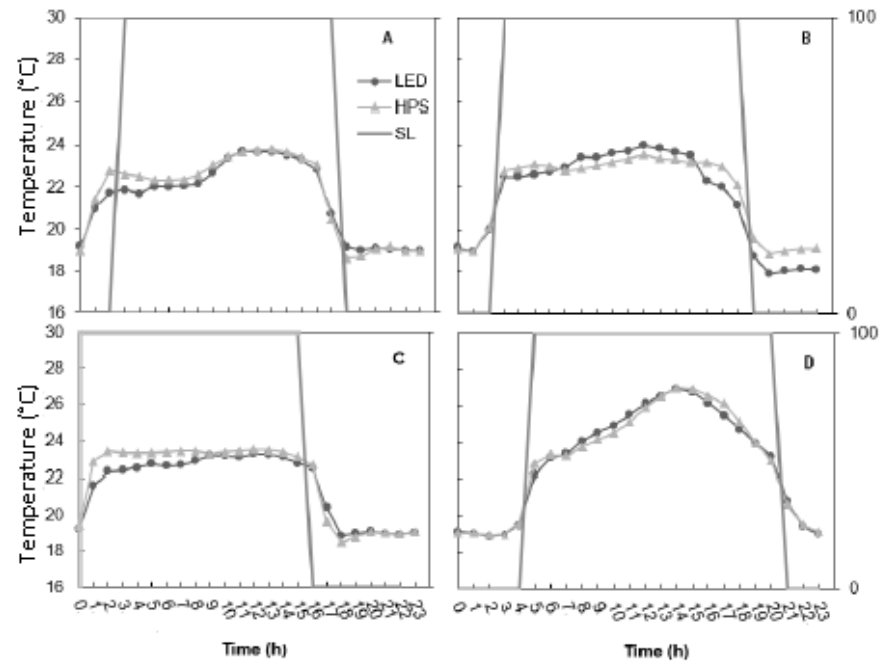

**Figure 3.** Air temperature (in °C) in greenhouse compartments provided with HPS and LEDs supplemental light during Table 1. (A), Expt. 2 (B), Expt. 3 (C) and Expt. 4 (D). Each point is the average value of 6 measurements per hour for 22 days.
